# Supplementary material for: Complete Mitochondrial Genomes of Five Racerunners (Lacertidae: Eremias) and Comparison with Other Lacertids: Insights into the Structure and Evolution of the Control Region
Source: MDPI journal article supplement (doi:10.3390/genes13050726), 2022-04-21
Supplement: s1 [file s1]

**Table S2.** Organization of five mitochondrial genomes of *Eremias* determined in this study.(a) *E. scripta* KZL15

| Gene/Element     | Position |       | Length(bp) | Codon |      | Intergenic nucleotide | Anticodon | Strand |
|------------------|----------|-------|------------|-------|------|-----------------------|-----------|--------|
|                  | From     | To    |            | Start | Stop |                       |           |        |
| <i>tRNA-Phe</i>  | 1        | 73    | 73         |       |      | -1                    | GAA       | H      |
| <i>12S rRNA</i>  | 73       | 1023  | 951        |       |      | -4                    |           | H      |
| <i>tRNA-Val</i>  | 1020     | 1086  | 67         |       |      | -5                    | TAC       | H      |
| <i>16S rRNA</i>  | 1082     | 2623  | 1542       |       |      | -1                    |           | H      |
| <i>tRNA-Leu2</i> | 2623     | 2695  | 73         |       |      | 0                     | TAA       | H      |
| <i>ND1</i>       | 2696     | 3664  | 969        | ATG   | TAA  | +5                    |           | H      |
| <i>tRNA-Ile</i>  | 3670     | 3741  | 72         |       |      | +8                    | GAT       | H      |
| <i>tRNA-Gln</i>  | 3750     | 3820  | 71         |       |      | -1                    | TTG       | L      |
| <i>tRNA-Met</i>  | 3820     | 3887  | 68         |       |      | 0                     | CAT       | H      |
| <i>ND2</i>       | 3888     | 4920  | 1033       | ATG   | T--  | 0                     |           | H      |
| <i>tRNA-Trp</i>  | 4921     | 4987  | 67         |       |      | +1                    | TCA       | H      |
| <i>tRNA-Ala</i>  | 4989     | 5057  | 69         |       |      | +2                    | TGC       | L      |
| <i>tRNA-Asn</i>  | 5060     | 5130  | 71         |       |      | +1                    | GTT       | L      |
| rep-origin       | 5132     | 5159  | 28         |       |      | 0                     |           | -      |
| <i>tRNA-Cys</i>  | 5160     | 5221  | 62         |       |      | +4                    | GCA       | L      |
| <i>tRNA-Tyr</i>  | 5226     | 5290  | 65         |       |      | +1                    | GTA       | L      |
| <i>COI</i>       | 5292     | 6836  | 1545       | GTG   | AGG  | -5                    |           | H      |
| <i>tRNA-Ser2</i> | 6832     | 6901  | 70         |       |      | +3                    | TGA       | L      |
| <i>tRNA-Asp</i>  | 6905     | 6976  | 72         |       |      | 0                     | GTC       | H      |
| <i>COII</i>      | 6977     | 7664  | 688        | ATG   | T--  | 0                     |           | H      |
| <i>tRNA-Lys</i>  | 7665     | 7731  | 67         |       |      | +1                    | TTT       | H      |
| <i>ATP8</i>      | 7733     | 7894  | 162        | ATG   | TAA  | -10                   |           | H      |
| <i>ATP6</i>      | 7885     | 8565  | 681        | ATG   | TAA  | -1                    |           | H      |
| <i>COIII</i>     | 8565     | 9348  | 784        | ATG   | T--  | 0                     |           | H      |
| <i>tRNA-Gly</i>  | 9349     | 9417  | 69         |       |      | 0                     | TCC       | H      |
| <i>ND3</i>       | 9418     | 9763  | 346        | ATG   | T--  | 0                     |           | H      |
| <i>tRNA-Arg</i>  | 9764     | 9829  | 66         |       |      | +1                    | TCG       | H      |
| <i>ND4L</i>      | 9831     | 10127 | 297        | ATG   | TAA  | -7                    |           | H      |
| <i>ND4</i>       | 10121    | 11501 | 1381       | ATG   | T--  | 0                     |           | H      |
| <i>tRNA-His</i>  | 11502    | 11570 | 69         |       |      | 0                     | GTG       | H      |
| <i>tRNA-Ser1</i> | 11571    | 11636 | 66         |       |      | -1                    | GCT       | H      |
| <i>tRNA-Leu1</i> | 11636    | 11706 | 71         |       |      | +3                    | TAG       | H      |
| <i>ND5</i>       | 11710    | 13533 | 1824       | ATG   | TAA  | -5                    |           | H      |
| <i>ND6</i>       | 13529    | 14050 | 522        | ATG   | AGG  | 0                     |           | L      |
| <i>tRNA-Glu</i>  | 14051    | 14117 | 67         |       |      | +1                    | TTC       | L      |
| <i>CYTB</i>      | 14119    | 15261 | 1143       | ATG   | TAG  | -1                    |           | H      |
| <i>tRNA-Thr</i>  | 15261    | 15331 | 71         |       |      | 0                     | TGT       | H      |
| <i>tRNA-Pro</i>  | 15332    | 15400 | 69         |       |      | 0                     | TGG       | L      |
| CR               | 15401    | 19824 | 4424       |       |      | -                     |           | -      |

(b) *E. scripta* KZL44

| Gene/Element     | From  | To    | Length(bp) | Codon |      | Intergenic<br>nucleotide | Anticodon | Strand |
|------------------|-------|-------|------------|-------|------|--------------------------|-----------|--------|
|                  |       |       |            | Start | Stop |                          |           |        |
| <i>tRNA-Phe</i>  | 1     | 73    | 73         |       |      | -1                       | GAA       | H      |
| <i>12S rRNA</i>  | 73    | 1023  | 951        |       |      | -4                       |           | H      |
| <i>tRNA-Val</i>  | 1020  | 1086  | 67         |       |      | -5                       | TAC       | H      |
| <i>16S rRNA</i>  | 1082  | 2623  | 1542       |       |      | -1                       |           | H      |
| <i>tRNA-Leu2</i> | 2623  | 2695  | 73         |       |      | 0                        | TAA       | H      |
| <i>ND1</i>       | 2696  | 3664  | 969        | ATG   | TAA  | +5                       |           | H      |
| <i>tRNA-Ile</i>  | 3670  | 3741  | 72         |       |      | +8                       | GAT       | H      |
| <i>tRNA-Gln</i>  | 3750  | 3820  | 71         |       |      | -1                       | TTG       | L      |
| <i>tRNA-Met</i>  | 3820  | 3887  | 68         |       |      | 0                        | CAT       | H      |
| <i>ND2</i>       | 3888  | 4920  | 1033       | ATG   | T--  | 0                        |           | H      |
| <i>tRNA-Trp</i>  | 4921  | 4987  | 67         |       |      | +1                       | TCA       | H      |
| <i>tRNA-Ala</i>  | 4989  | 5057  | 69         |       |      | +2                       | TGC       | L      |
| <i>tRNA-Asn</i>  | 5060  | 5130  | 71         |       |      | -1                       | GTT       | L      |
| rep-origin       | 5130  | 5159  | 30         |       |      | 0                        |           | -      |
| <i>tRNA-Cys</i>  | 5160  | 5221  | 62         |       |      | +4                       | GCA       | L      |
| <i>tRNA-Tyr</i>  | 5226  | 5290  | 65         |       |      | +1                       | GTA       | L      |
| <i>COI</i>       | 5292  | 6836  | 1545       | GTG   | AGG  | -5                       |           | H      |
| <i>tRNA-Ser2</i> | 6832  | 6901  | 70         |       |      | +3                       | TGA       | L      |
| <i>tRNA-Asp</i>  | 6905  | 6976  | 72         |       |      | 0                        | GTC       | H      |
| <i>COII</i>      | 6977  | 7664  | 688        | ATG   | T--  | 0                        |           | H      |
| <i>tRNA-Lys</i>  | 7665  | 7731  | 67         |       |      | +1                       | TTT       | H      |
| <i>ATP8</i>      | 7733  | 7894  | 162        | ATG   | TAA  | -10                      |           | H      |
| <i>ATP6</i>      | 7885  | 8565  | 681        | ATG   | TAA  | -1                       |           | H      |
| <i>COIII</i>     | 8565  | 9348  | 784        | ATG   | T--  | 0                        |           | H      |
| <i>tRNA-Gly</i>  | 9349  | 9417  | 69         |       |      | 0                        | TCC       | H      |
| <i>ND3</i>       | 9418  | 9763  | 346        | ATG   | T--  | 0                        |           | H      |
| <i>tRNA-Arg</i>  | 9764  | 9829  | 66         |       |      | +1                       | TCG       | H      |
| <i>ND4L</i>      | 9831  | 10127 | 297        | ATG   | TAA  | -7                       |           | H      |
| <i>ND4</i>       | 10121 | 11501 | 1381       | ATG   | T--  | 0                        |           | H      |
| <i>tRNA-His</i>  | 11502 | 11570 | 69         |       |      | 0                        | GTG       | H      |
| <i>tRNA-Ser1</i> | 11571 | 11636 | 66         |       |      | -1                       | GCT       | H      |
| <i>tRNA-Leu1</i> | 11636 | 11706 | 71         |       |      | +3                       | TAG       | H      |
| <i>ND5</i>       | 11710 | 13533 | 1824       | ATG   | TAA  | -5                       |           | H      |
| <i>ND6</i>       | 13529 | 14050 | 522        | ATG   | AGG  | 0                        |           | L      |
| <i>tRNA-Glu</i>  | 14051 | 14117 | 67         |       |      | +1                       | TTC       | L      |
| <i>CYTB</i>      | 14119 | 15260 | 1142       | ATG   | TA-  | 0                        |           | H      |
| <i>tRNA-Thr</i>  | 15261 | 15331 | 71         |       |      | 0                        | TGT       | H      |
| <i>tRNA-Pro</i>  | 15332 | 15400 | 69         |       |      | 0                        | TGG       | L      |
| CR               | 15401 | 19381 | 3981       |       |      | -                        |           | -      |

(c) *E. nikolskii*

| Gene/Element     | Position |       | Length<br>(bp) | Codon |      | Intergenic<br>nucleotide | Anticodon | Strand |
|------------------|----------|-------|----------------|-------|------|--------------------------|-----------|--------|
|                  | From     | To    |                | Start | Stop |                          |           |        |
| <i>tRNA-Phe</i>  | 1        | 72    | 72             |       |      | 0                        | GAA       | H      |
| <i>12S rRNA</i>  | 73       | 1023  | 951            |       |      | 0                        |           | H      |
| <i>tRNA-Val</i>  | 1024     | 1089  | 66             |       |      | 0                        | TAC       | H      |
| <i>16S rRNA</i>  | 1090     | 2634  | 1545           |       |      | 0                        |           | H      |
| <i>tRNA-Leu2</i> | 2635     | 2707  | 73             |       |      | 0                        | TAA       | H      |
| <i>ND1</i>       | 2708     | 3676  | 969            | ATG   | TAA  | +6                       |           | H      |
| <i>tRNA-Ile</i>  | 3683     | 3754  | 72             |       |      | -1                       | GAT       | H      |
| <i>tRNA-Gln</i>  | 3754     | 3824  | 71             |       |      | -1                       | TTG       | L      |
| <i>tRNA-Met</i>  | 3824     | 3891  | 68             |       |      | 0                        | CAT       | H      |
| <i>ND2</i>       | 3892     | 4924  | 1033           | ATG   | T--  | 0                        |           | H      |
| <i>tRNA-Trp</i>  | 4925     | 4994  | 70             |       |      | +1                       | TCA       | H      |
| <i>tRNA-Ala</i>  | 4996     | 5064  | 69             |       |      | +1                       | TGC       | L      |
| <i>tRNA-Asn</i>  | 5065     | 5137  | 73             |       |      | 0                        | GTT       | L      |
| rep-origin       | 5138     | 5164  | 70             |       |      | 0                        |           | -      |
| <i>tRNA-Cys</i>  | 5165     | 5226  | 62             |       |      | +5                       | GCA       | L      |
| <i>tRNA-Tyr</i>  | 5232     | 5295  | 64             |       |      | +1                       | GTA       | L      |
| <i>COI</i>       | 5297     | 6841  | 1545           | GTG   | AGG  | -5                       |           | H      |
| <i>tRNA-Ser2</i> | 6837     | 6906  | 70             |       |      | +3                       | TGA       | L      |
| <i>tRNA-Asp</i>  | 6910     | 6982  | 73             |       |      | 0                        | GTC       | H      |
| <i>COII</i>      | 6983     | 7670  | 688            | ATG   | T--  | 0                        |           | H      |
| <i>tRNA-Lys</i>  | 7671     | 7735  | 65             |       |      | +1                       | TTT       | H      |
| <i>ATP8</i>      | 7737     | 7898  | 162            | ATG   | TAA  | -10                      |           | H      |
| <i>ATP6</i>      | 7889     | 8569  | 681            | ATG   | TAA  | -1                       |           | H      |
| <i>COIII</i>     | 8569     | 9352  | 784            | ATG   | T--  | 0                        |           | H      |
| <i>tRNA-Gly</i>  | 9353     | 9421  | 69             |       |      | 0                        | TCC       | H      |
| <i>ND3</i>       | 9422     | 9767  | 346            | ATG   | T--  | 0                        |           | H      |
| <i>tRNA-Arg</i>  | 9768     | 9834  | 67             |       |      | +1                       | TCG       | H      |
| <i>ND4L</i>      | 9836     | 10132 | 297            | ATG   | TAA  | -7                       |           | H      |
| <i>ND4</i>       | 10126    | 11506 | 1381           | ATG   | T--  | 0                        |           | H      |
| <i>tRNA-His</i>  | 11507    | 11575 | 69             |       |      | 0                        | GTG       | H      |
| <i>tRNA-Ser1</i> | 11576    | 11641 | 66             |       |      | -1                       | GCT       | H      |
| <i>tRNA-Leu1</i> | 11641    | 11711 | 71             |       |      | +3                       | TAG       | H      |
| <i>ND5</i>       | 11715    | 13538 | 1824           | ATG   | TAA  | -5                       |           | H      |
| <i>ND6</i>       | 13534    | 14055 | 522            | ATG   | AGG  | 0                        |           | L      |
| <i>tRNA-Glu</i>  | 14056    | 14124 | 69             |       |      | 0                        | TTC       | L      |
| <i>CYTB</i>      | 14125    | 15267 | 1143           | ATG   | TAG  | -1                       |           | H      |
| <i>tRNA-Thr</i>  | 15267    | 15336 | 70             |       |      | 0                        | TGT       | H      |
| <i>tRNA-Pro</i>  | 15337    | 15404 | 68             |       |      | 0                        | TGG       | L      |
| CR               | 15405    | 20840 | 5436           |       |      |                          |           | -      |

(d) *E. szczerbaki*

| Gene/Element     | Position |       | Length(bp) | Codon |      | Intergenic<br>nucleotide | Anticodon | Strand |
|------------------|----------|-------|------------|-------|------|--------------------------|-----------|--------|
|                  | From     | To    |            | Start | Stop |                          |           |        |
| <i>tRNA-Phe</i>  | 1        | 73    | 73         |       |      | 0                        | GAA       | H      |
| <i>12S rRNA</i>  | 74       | 1024  | 951        |       |      | 0                        |           | H      |
| <i>tRNA-Val</i>  | 1025     | 1090  | 66         |       |      | +1                       | TAC       | H      |
| <i>16S rRNA</i>  | 1092     | 2628  | 1537       |       |      | 0                        |           | H      |
| <i>tRNA-Leu2</i> | 2629     | 2701  | 73         |       |      | 0                        | TAA       | H      |
| <i>ND1</i>       | 2702     | 3670  | 969        | ATG   | TAA  | +4                       |           | H      |
| <i>tRNA-Ile</i>  | 3675     | 3746  | 72         |       |      | 0                        | GAT       | H      |
| <i>tRNA-Gln</i>  | 3747     | 3817  | 71         |       |      | -1                       | TTG       | L      |
| <i>tRNA-Met</i>  | 3817     | 3884  | 68         |       |      | 0                        | CAT       | H      |
| <i>ND2</i>       | 3885     | 4917  | 1033       | ATG   | T--  | 0                        |           | H      |
| <i>tRNA-Trp</i>  | 4918     | 4985  | 68         |       |      | +1                       | TCA       | H      |
| <i>tRNA-Ala</i>  | 4987     | 5055  | 69         |       |      | +2                       | TGC       | L      |
| <i>tRNA-Asn</i>  | 5058     | 5128  | 71         |       |      | +1                       | GTT       | L      |
| rep-origin       | 5130     | 5159  | 30         |       |      | 0                        |           | -      |
| <i>tRNA-Cys</i>  | 5160     | 5221  | 62         |       |      | +5                       | GCA       | L      |
| <i>tRNA-Tyr</i>  | 5227     | 5289  | 63         |       |      | +1                       | GTA       | L      |
| <i>COI</i>       | 5291     | 6835  | 1545       | GTG   | AGG  | -5                       |           | H      |
| <i>tRNA-Ser2</i> | 6831     | 6900  | 70         |       |      | +3                       | TGA       | L      |
| <i>tRNA-Asp</i>  | 6904     | 6976  | 73         |       |      | 0                        | GTC       | H      |
| <i>COII</i>      | 6977     | 7664  | 688        | ATG   | T--  | 0                        |           | H      |
| <i>tRNA-Lys</i>  | 7665     | 7729  | 65         |       |      | +1                       | TTT       | H      |
| <i>ATP8</i>      | 7731     | 7892  | 162        | ATG   | TAA  | -10                      |           | H      |
| <i>ATP6</i>      | 7883     | 8563  | 681        | ATG   | TAA  | -1                       |           | H      |
| <i>COIII</i>     | 8563     | 9346  | 784        | ATG   | T--  | 0                        |           | H      |
| <i>tRNA-Gly</i>  | 9347     | 9415  | 69         |       |      | 0                        | TCC       | H      |
| <i>ND3</i>       | 9416     | 9761  | 346        | ATG   | T--  | 0                        |           | H      |
| <i>tRNA-Arg</i>  | 9762     | 9826  | 65         |       |      | +1                       | TCG       | H      |
| <i>ND4L</i>      | 9828     | 10124 | 297        | ATG   | TAA  | -7                       |           | H      |
| <i>ND4</i>       | 10118    | 11498 | 1381       | ATG   | T--  | 0                        |           | H      |
| <i>tRNA-His</i>  | 11499    | 11567 | 69         |       |      | 0                        | GTG       | H      |
| <i>tRNA-Ser1</i> | 11568    | 11633 | 66         |       |      | -1                       | GCT       | H      |
| <i>tRNA-Leu1</i> | 11633    | 11703 | 71         |       |      | +3                       | TAG       | H      |
| <i>ND5</i>       | 11707    | 13530 | 1824       | ATG   | TAA  | -5                       |           | H      |
| <i>ND6</i>       | 13526    | 14047 | 522        | ATG   | AGG  | 0                        |           | L      |
| <i>tRNA-Glu</i>  | 14048    | 14116 | 69         |       |      | +1                       | TTC       | L      |
| <i>CYTB</i>      | 14118    | 15260 | 1143       | ATG   | TAA  | 0                        |           | H      |
| <i>tRNA-Thr</i>  | 15261    | 15330 | 70         |       |      | 0                        | TGT       | H      |
| <i>tRNA-Pro</i>  | 15331    | 15399 | 68         |       |      | 0                        | TGG       | L      |
| CR               | 15400    | 19650 | 4251       |       |      |                          |           | -      |

(e) *E. yarkandensis*

| Gene/Element     | Position |       | Length(bp) | Codon |      | Intergenic nucleotide | Anticodon | Strand |
|------------------|----------|-------|------------|-------|------|-----------------------|-----------|--------|
|                  | From     | To    |            | Start | Stop |                       |           |        |
| <i>tRNA-Phe</i>  | 1        | 73    | 73         |       |      | 0                     | GAA       | H      |
| <i>12S rRNA</i>  | 74       | 1024  | 951        |       |      | -1                    |           | H      |
| <i>tRNA-Val</i>  | 1024     | 1090  | 67         |       |      | +1                    | TAC       | H      |
| <i>16S rRNA</i>  | 1092     | 2634  | 1543       |       |      | 0                     |           | H      |
| <i>tRNA-Leu2</i> | 2635     | 2707  | 73         |       |      | 0                     | TAA       | H      |
| <i>ND1</i>       | 2708     | 3676  | 969        | GTG   | TAA  | +4                    |           | H      |
| <i>tRNA-Ile</i>  | 3681     | 3752  | 72         |       |      | 0                     | GAT       | H      |
| <i>tRNA-Gln</i>  | 3753     | 3823  | 71         |       |      | -1                    | TTG       | L      |
| <i>tRNA-Met</i>  | 3823     | 3890  | 68         |       |      | 0                     | CAT       | H      |
| <i>ND2</i>       | 3891     | 4923  | 1033       | ATG   | T--  | 0                     |           | H      |
| <i>tRNA-Trp</i>  | 4924     | 4991  | 68         |       |      | +1                    | TCA       | H      |
| <i>tRNA-Ala</i>  | 4993     | 5061  | 69         |       |      | +2                    | TGC       | L      |
| <i>tRNA-Asn</i>  | 5064     | 5134  | 71         |       |      | +1                    | GTT       | L      |
| rep-origin       | 5136     | 5164  | 29         |       |      | 0                     |           | -      |
| <i>tRNA-Cys</i>  | 5165     | 5226  | 62         |       |      | +5                    | GCA       | L      |
| <i>tRNA-Tyr</i>  | 5232     | 5295  | 64         |       |      | +1                    | GTA       | L      |
| <i>COI</i>       | 5297     | 6841  | 1545       | GTG   | AGG  | -5                    |           | H      |
| <i>tRNA-Ser2</i> | 6837     | 6906  | 70         |       |      | +3                    | TGA       | L      |
| <i>tRNA-Asp</i>  | 6910     | 6982  | 73         |       |      | 0                     | GTC       | H      |
| <i>COII</i>      | 6983     | 7670  | 688        | ATG   | T--  | 0                     |           | H      |
| <i>tRNA-Lys</i>  | 7671     | 7735  | 65         |       |      | +1                    | TTT       | H      |
| <i>ATP8</i>      | 7737     | 7898  | 162        | ATG   | TAA  | -10                   |           | H      |
| <i>ATP6</i>      | 7889     | 8569  | 681        | ATG   | TAA  | -1                    |           | H      |
| <i>COIII</i>     | 8569     | 9352  | 784        | ATG   | T--  | 0                     |           | H      |
| <i>tRNA-Gly</i>  | 9353     | 9421  | 69         |       |      | 0                     | TCC       | H      |
| <i>ND3</i>       | 9422     | 9767  | 346        | ATG   | T--  | 0                     |           | H      |
| <i>tRNA-Arg</i>  | 9768     | 9832  | 65         |       |      | +1                    | TCG       | H      |
| <i>ND4L</i>      | 9834     | 10130 | 297        | ATG   | TAA  | -7                    |           | H      |
| <i>ND4</i>       | 10124    | 11504 | 1381       | ATG   | T--  | 0                     |           | H      |
| <i>tRNA-His</i>  | 11505    | 11573 | 69         |       |      | 0                     | GTG       | H      |
| <i>tRNA-Ser1</i> | 11574    | 11639 | 66         |       |      | -1                    | GCT       | H      |
| <i>tRNA-Leu1</i> | 11639    | 11709 | 71         |       |      | +3                    | TAG       | H      |
| <i>ND5</i>       | 11713    | 13536 | 1824       | ATG   | TAA  | -5                    |           | H      |
| <i>ND6</i>       | 13532    | 14053 | 522        | ATG   | AGG  | 0                     |           | L      |
| <i>tRNA-Glu</i>  | 14054    | 14122 | 69         |       |      | +1                    | TTC       | L      |
| <i>CYTB</i>      | 14124    | 15266 | 1143       | ATG   | TAA  | 0                     |           | H      |
| <i>tRNA-Thr</i>  | 15267    | 15335 | 69         |       |      | 0                     | TGT       | H      |
| <i>tRNA-Pro</i>  | 15336    | 15404 | 69         |       |      | 0                     | TGG       | L      |
| CR               | 15405    | 18743 | 3339       |       |      |                       |           | -      |
