# Supplementary material for: Complete Mitochondrial Genomes of Five Racerunners (Lacertidae: Eremias) and Comparison with Other Lacertids: Insights into the Structure and Evolution of the Control Region
Source: MDPI journal article supplement (doi:10.3390/genes13050726), 2022-04-21
Supplement: s1 [file s1]

**Table S6.** Tandem repeats of the CR in species in Lacertidae.

| Species                          | Copy number | Length | Tandem repeat motif                                                                            |
|----------------------------------|-------------|--------|------------------------------------------------------------------------------------------------|
| <i>Acanthodactylus boskianus</i> | 2.4         | 11     | TTTTCAACAAA                                                                                    |
| <i>Ac. erythrurus</i>            | 2.0         | 56     | TATGTATATTGTACATTAATTTATTTACCCCATGAATATCATCTATATACCTACTT                                       |
| <i>Australolacerta australis</i> | 2.8         | 12     | CACTTTTTTGGC                                                                                   |
| <i>Darevskia armeniaca</i>       | 2.2         | 87     | AGCACCTACAACCCAGCCGCTAAATGCGGCTTTTTTGCCCAACACACAACAAACAACCTCAACTTTAACCTTCCATCCCCTACTTCAC       |
|                                  | 2.3         | 22     | CAAAACTTTTAACAAATTTTAC                                                                         |
| <i>D. brauneri</i>               | 3.7         | 10     | AAATTTTAAC                                                                                     |
| <i>D. caucasica</i>              | 2.0         | 63     | TACCCAGCCGCTAAATGCGGCTTTTTTGCTCCAAACACCCAACTAACAACCTCAACTTTAACCC                               |
|                                  | 2.3         | 22     | CAAAAATTTTAACAAATTTTAC                                                                         |
| <i>D. chlorogaster</i>           | 1.8         | 92     | TACCCAGCCGCTTAGTGCGGCTTTTTTGCTCCAAACAACCAACAACAAGTCAACTTTAACCTATTAACCCCTGCCTTACATGGCACCTTC     |
|                                  | 2.6         | 90     | CTCCAAACAACCAACAACAAGTCAACTTTAACCTGTAAACCCCTGCCACATGGCACCTTCTACCCAGCCGCTTAGTGCGGCTTTTTTG       |
| <i>D. clarkorum</i>              | 2.3         | 22     | CAAAACTTTTAAAAAATTTTAC                                                                         |
|                                  | 2.1         | 20     | ACAAAAAACAACAAAAATTTA                                                                          |
| <i>D. daghestanica</i>           | 2.0         | 53     | CAACTCAACTTAAACCTCCCAACCCCTACCTTACATTAAACCTCTTACCCAGCCGCTAAACGCGGCTTTTTTGCTCCAAACATCCAACAAGCAA |
|                                  |             |        | CTCAACTTAAACCTCCCAACCCCTAC                                                                     |
|                                  | 2.4         | 22     | CAAAACTTTTAACAAATTTTAC                                                                         |
| <i>D. dahl</i>                   | 2.3         | 22     | CAAAACTTTTAACAAATTTTAC                                                                         |
| <i>D. derjugini</i>              | 1.9         | 90     | TTACCTAGCCGCTAAATGCGGCTTTTTTGCTCCAAACATCCAACAAATAACACAACCTTTAACCTTCTAACCCCTGCTTCACTGCACTGG     |
| <i>D. mixta</i>                  | 2.0         | 87     | AACCCAGCCGCTAAATGCGGCTTTTTTGCTCCAAACACACAACAAACAACCTCAACTTTAACCTTCCAACCCCTACTTCACAGCACCTGT     |
|                                  | 2.3         | 22     | CAAAACTTTTAACAAATTTTAC                                                                         |
| <i>D. parvula</i>                | 2.6         | 23     | CAAAACTTTTAACAAATTTTATAC                                                                       |
| <i>D. portschinskii</i>          | 3.0         | 23     | CAAAACTTTTAACAAATTTTAC                                                                         |
| <i>D. raddei</i>                 | 2.8         | 59     | CACACATTCAACAAATAATTCAACTTTAACCTCCCAATACCTACTACACAAACTGCCAT                                    |
|                                  | 4.8         | 58     | CACACATTCACAACTATTCAACTTTAACCTCCCAATACCTACAACACAAACTGCCAT                                      |
|                                  | 3.9         | 59     | TGCCTCCACACATTCAACAAATAATTCAACTTTAACCTCCCAATACCTACGACACAAAC                                    |
|                                  | 26.6        | 58     | CAACTTTAACCTCCCAATACCTACAACACAAACTGCCATCACACATTCAACAAACATT                                     |
|                                  | 4.5         | 61     | AACTTTAACCTCCCAATACCTACGACACAAACACTTTGCCATCACATTCAACAAACCATTC                                  |
| <i>D. rudis</i>                  | 3.0         | 23     | CAAAACTTTTAACAAATTTTAC                                                                         |
| <i>D. saxicola</i>               | 3.0         | 22     | ACAAAACCTTTTAACAAATTTTA                                                                        |
| <i>D. unisexualis</i>            | 2.0         | 15     | AACACCTACTACACC                                                                                |
|                                  | 2.4         | 22     | CAAAACTTTTAACAAATTTTAC                                                                         |
| <i>Eremias argus</i>             | 2.3         | 20     | AAAAAAATTTTTTATAATA                                                                            |
|                                  | 7.8         | 65     | CCTAAAACCAGGCTGCCCAAGCAGCCGATTCTTACTCCCCAAGCCGCTTCTAGCGGCTTTTTTG                               |

|                         |     |         |                                                                                                                                                                  |
|-------------------------|-----|---------|------------------------------------------------------------------------------------------------------------------------------------------------------------------|
| <i>E. brencleyi</i>     | 65  | 13.5    | AAAAGTAGCCGCCCCAGCGGCCTAATTCTTCCTACCCAGCCGCTTCTAGCGGCTTTTTGCCTT                                                                                                  |
|                         | 19  | 2.1     | TACATAATACATAACTGTT                                                                                                                                              |
|                         | 12  | 2.5     | TTTGTAAAAACC                                                                                                                                                     |
|                         | 56  | 14.3    | ACAAAGATCAATTCGTTTGTGTTAACCTAAATTTCTCTAGAACACAAACAAATTG                                                                                                          |
|                         | 19  | 2.8     | TTTTTAATTAAAAATATTT                                                                                                                                              |
|                         | 10  | 5.1     | AATTTTTTTT                                                                                                                                                       |
|                         | 19  | 1.9     | AAAATAATTTTAAATTTTT                                                                                                                                              |
| <i>E. dzungarica</i>    | 57  | 6.5     | CCTAAAAACAGGCCGCTCAGGCGGCCACTACCCAGCCGCTTATAGCGGCTTTTTTG                                                                                                         |
|                         | 56  | 17.0    | TTAACAAAGAACAATTCGTTTGTATTGTCTAAACTTATCTAGAACACAAATAAA                                                                                                           |
|                         | 20  | 2.4 × 2 | AAAAAATTTCTTTATTTTCA                                                                                                                                             |
| <i>E. multiocellata</i> | 61  | 6.7     | CCTAAAAACAGGCCGCCCCAGCGGCCATTACTCCCCCTGCCGCTTATAGCGGCTTTTTTG                                                                                                     |
|                         | 56  | 13.8    | AACAAAGAACAATTCGTTTGTGTTAACCTAAACTTCTCTAGAACACAAACGAATT                                                                                                          |
| <i>E. nikolskii</i>     | 65  | 12.6    | CCCTAAAACAGGCCGCTCCAGCGGCTTACCCACCCCTCACCAGCCGCTTCTAGCGGCTTTTTTG                                                                                                 |
|                         | 56  | 8.9     | AACAAATTAACAAAGAACAACCTGTTTGTATTAACTAAACTTCTCGGGAACACA                                                                                                           |
|                         | 20  | 2.5 × 3 | TTTAAAAAATTTTTCTATT                                                                                                                                              |
| <i>E. przewalskii</i>   | 66  | 7.8     | CCTAAAAACAGGCCGCTCCGACGGCCCTTGCCCCCTCACCCCGCCGCTTATAGCGGCTTTTTTG                                                                                                 |
|                         | 56  | 12.0    | ACAAAGAACAATTCGTTTGTATTGTCTAAACTTATCTAGAACACAAACGAATT                                                                                                            |
|                         | 18  | 1.9     | TAAAAATAATTTTTTTAT                                                                                                                                               |
| <i>E. scripta</i> KZL15 | 67  | 10.5    | CCTTTAAACAAGCCGTCCAAGACGGCATGCATTCCCCTTACCCGCGCTTCTAGCGGCTTTTTTG                                                                                                 |
|                         | 11  | 4.2     | TTTTTAACAAA                                                                                                                                                      |
|                         | 155 | 13.7    | AAAGGTAAATTTGTTTATAATTAACCTAAATTTGTCTAGAACACAAACAAATTAATAAAAGAACTAATTTGTTTATAATTGACTTAAATTTACCTA<br>GAACACAAACAAATTAACAAAGATTAATTCATTTGTAACCTAACTAAATTTTAAATTTTA |
|                         |     |         | CCTTTAAACAAGCCGTCCAAGACGGCATGCATTCCCCTTACCCGCGCTTCTAGCGGCTTTTTTG                                                                                                 |
| <i>E. scripta</i> KZL44 | 67  | 8.6     | AAAGGTAAATTTGTTTATAATTAACCTAAATTTGTCTAGAACACAAACAAATTAATAAAAGAACTAATTTGTTTATAATTGACTTAAATTTACCTA<br>GAACACAAACAAATTAACAAAGATTAATTCATTTGTAACCTAACTAAATTTTAAATTTTA |
|                         | 11  | 4.2     | TTTTTAACAAA                                                                                                                                                      |
|                         | 155 | 11.7    | AAAGGTAAATTTGTTTATAATTAACCTAAATTTGTCTAGAACACAAACAAATTAATAAAAGAACTAATTTGTTTATAATTGACTTAAATTTACCTA<br>GAACACAAACAAATTAACAAAGATTAATTCATTTGTAACCTAACTAAATTTTAAATTTTA |
| <i>E. stummeri</i>      | 54  | 10.3    | CCTACAACCAACCATCCCCATACATTTTACAAGCCGCTTCTAGCGGCTTTTTTG                                                                                                           |
|                         | 56  | 22.1    | TCTCTAGAACACAAACAACTAACAAAGAACAATTCGTTTGTGTTAACCTAGATT                                                                                                           |
|                         | 11  | 2.9     | TTTTTTAAATA                                                                                                                                                      |
| <i>E. szczrbaki</i>     | 61  | 5.9     | CCTTAAACCAGCCGCCAACGGCCCTATTTCACTCCAAGCCGCGCATAGCGGCTTTTTTG                                                                                                      |
|                         | 56  | 12.2    | ACAAACGAATTCACAAAGAACAATTCGTTTGTATTAACTAACTTCTCTAGAAC                                                                                                            |
|                         | 21  | 2.1 × 2 | AAAAATTTTATTTTTTAAAA                                                                                                                                             |
| <i>E. vermiculata</i>   | 55  | 18.3    | TCCACTTCTCACCCTATTTCTCTACTTCACATGCCGCTCCTAGCGGCTTTTTTG                                                                                                           |
|                         | 56  | 13.1    | TCTAGAACACAAACGAATTAACAAAGAACAATTCGTTTGTAAATTAACCTAAGTTTC                                                                                                        |
|                         | 56  | 6.1     | TTCTCTAGAACACAAACGAATTAACAAAGAACAATTCGTTTGTAAATTAACCTAGGT                                                                                                        |
|                         | 10  | 4.1     | TAAATATTTT                                                                                                                                                       |
| <i>E. yarkandensis</i>  | 65  | 5.8     | CCTAAAAACAGGCCGCTCCGGCGGCCATTGCCCCCTCCCCAGCCGCTTCTAGCGGCTTTTTTG                                                                                                  |
|                         | 56  | 11.3    | TTAACAAACAACAATTCGTTTGTATTATCCTAAACTTATCTAGAACACAAATAAA                                                                                                          |
|                         | 19  | 2.4     | CAAAAAAATTTCTTATTTT                                                                                                                                              |

|                                |    |      |                                                                                  |
|--------------------------------|----|------|----------------------------------------------------------------------------------|
| <i>Lacerta agilis</i>          | 36 | 6.5  | ACCCAGCCGCTCCAAGAGCGGCTTTTTGCCTCTAC                                              |
|                                | 11 | 3.4  | TTTAAACAAAC                                                                      |
| <i>L. bilineata</i>            | 11 | 4.1  | ACAAATTTTTA                                                                      |
| <i>L. viridis viridis</i>      | 11 | 4.1  | ACAAATTTTTA                                                                      |
| <i>Pedioplanis laticeps</i>    | 13 | 3.1  | TAAAAAATTTTT                                                                     |
| <i>Phoenicolacerta kulzeri</i> | 34 | 8.7  | AGCGGCTTTTTACCTCCCCCACCAGCCACTCTT                                                |
| <i>Podarcis muralis</i>        | 34 | 11.7 | CCACCTGCCGCTCCAGCGGCTTTTTGCCTCCA                                                 |
|                                | 11 | 2.5  | AAATTTTAACA                                                                      |
| <i>Podarcis siculus</i>        | 36 | 11.4 | CCAGCCGCTCCACAAGCGGCTTTTTGCCTCCCTAC                                              |
| <i>Psammodromus algirus</i>    | 14 | 2.1  | AAATAAAAAACAAC                                                                   |
| <i>Takydromus amurensis</i>    | 67 | 3.6  | TAACACATGCCGCTACAAGCGGCTATTTTCCCTCTACCATTAAACAAGTAAATACAAACATATATCTC             |
|                                | 80 | 2.3  | ATATATGTTTAATCGTGCATTAACTTATTTACCCCATGAAAAATATATATATACAGTATCCTAATAATAAGACATAATAC |
|                                | 20 | 2.0  | AATTTTGAAAAATTCGTCC                                                              |
| <i>T. kuehnei</i>              | 70 | 2.2  | ACTTTTGATGCCGCCTTACGCGGCTTATTTTCCCAGCTATTAGTTTGTAATTGATCAATTGGTTTGTA             |
|                                | 70 | 2.0  | TATTAGTCTGTAATTGATCAATTGGTTTGTAACCTTTGTATGCCGCCTTGCGGGCTTATTTCCCTGC              |
| <i>T. septentrionalis</i>      | 68 | 18.2 | ATTTTCCCTCTAGCATTAAATCAAACCTAATACAAGTACCTATCTACAAACCATGCCGCTATACGCGGCTT          |
| <i>T. sexlineatus</i>          | 68 | 30.0 | TTTTACATGCCGCCTCGCGGGCTTATTTTCCCCTCTCAAATAATGAACAAACAAACATACTTTCC                |
| <i>T. sylvaticus</i>           | 69 | 8.1  | ATTTTCCCTCTACTCCTACACAAGTTAATACACTCCAACCATATTCAACACATGCCGCATCCTGCGGCTT           |
|                                | 69 | 5.1  | TCCTGCGGCTTATTTTCCCTCTACTCCTACACAAGTTAATACACTCCAACCATATTCAACACATGCCGCA           |
| <i>T. tachydromoides</i>       | 65 | 8.0  | TTTTCCCTCTACATTAAACAAGTAAATACAAGAATTTTACTATCTCATGCCGCTATAAGCGGCTTA               |
| <i>T. wolteri</i>              | 67 | 17.4 | TAACCATGCCGCTCTATGCGGCTTTTTACCTCTACCACTACTTGACAAAATACAAATAATACCCAA               |
| <i>Zootoca vivipara</i>        | 34 | 2.6  | TTTTGCCTCTACCACTAGCCGCTTTATGCGGCTT                                               |

Note:

The motif segment “TAGCGGCTTTTTG” present in all examined *Eremias* species is in purple.

The motif segment “GCGGCTT” present in seven species of *Takydromus* is in green; segment “TTTTCC” present in six species of *Takydromus* is in blue.

“×2” or “×3” denotes similar type of TR in the species duplicated twice or three times, respectively.
