# Supplementary material for: Complete Mitochondrial Genomes of Five Racerunners (Lacertidae: Eremias) and Comparison with Other Lacertids: Insights into the Structure and Evolution of the Control Region
Source: MDPI journal article supplement (doi:10.3390/genes13050726), 2022-04-21

(a) *Eremias scripta* KZL15

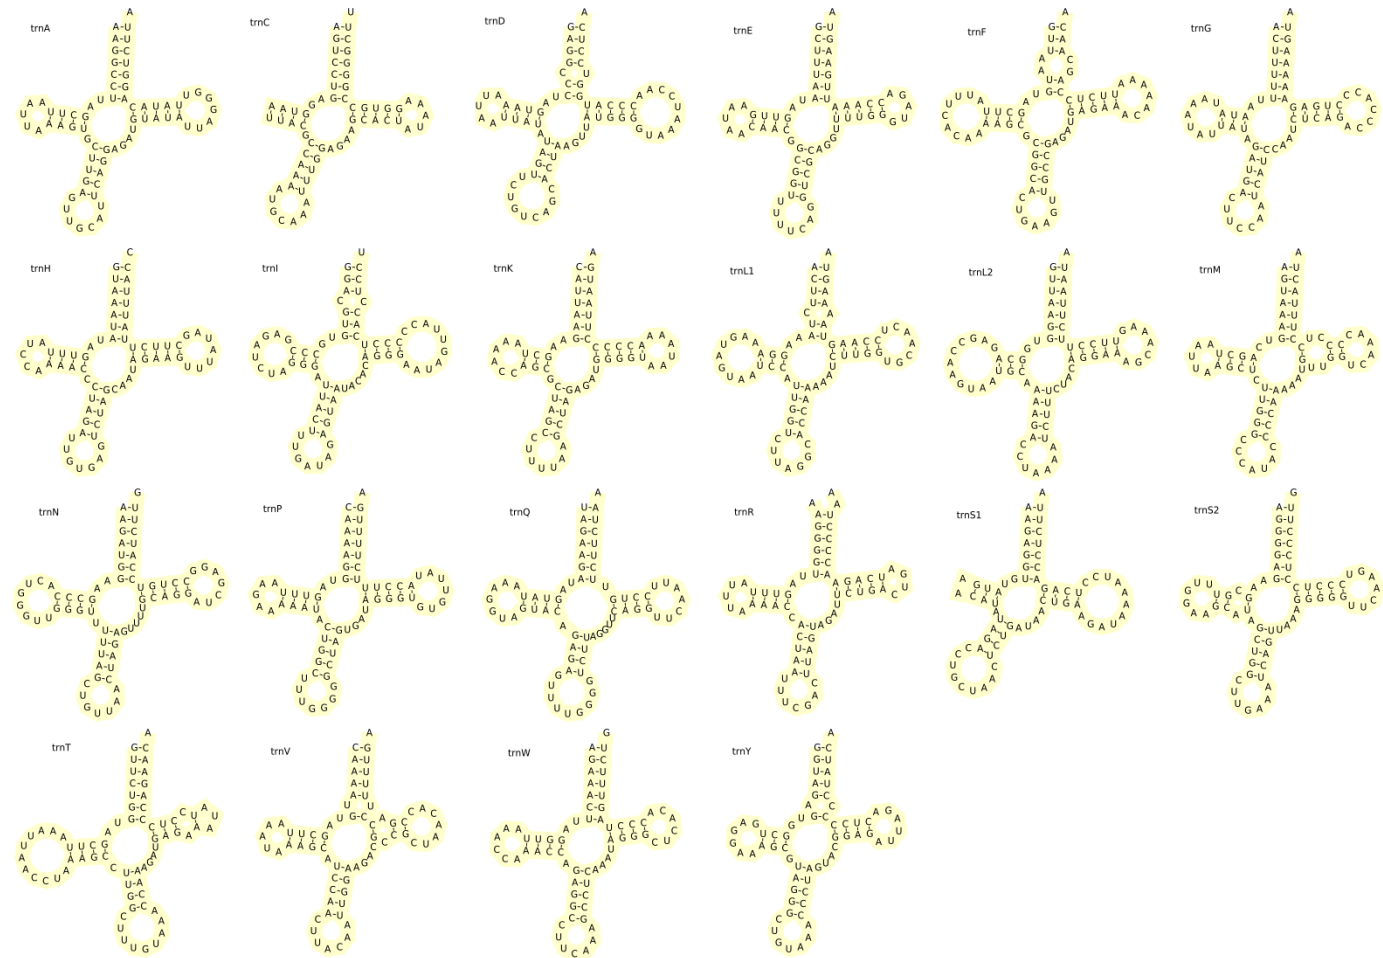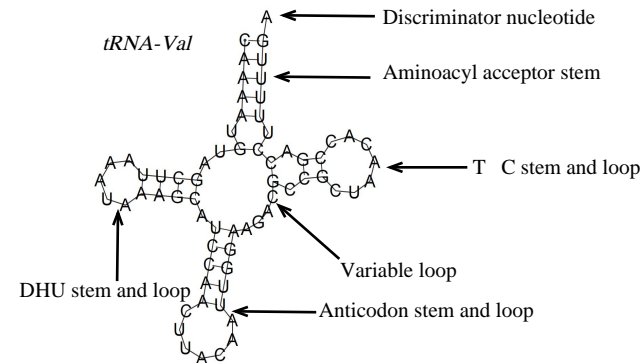

(b) *Eremias scripta* KZL44

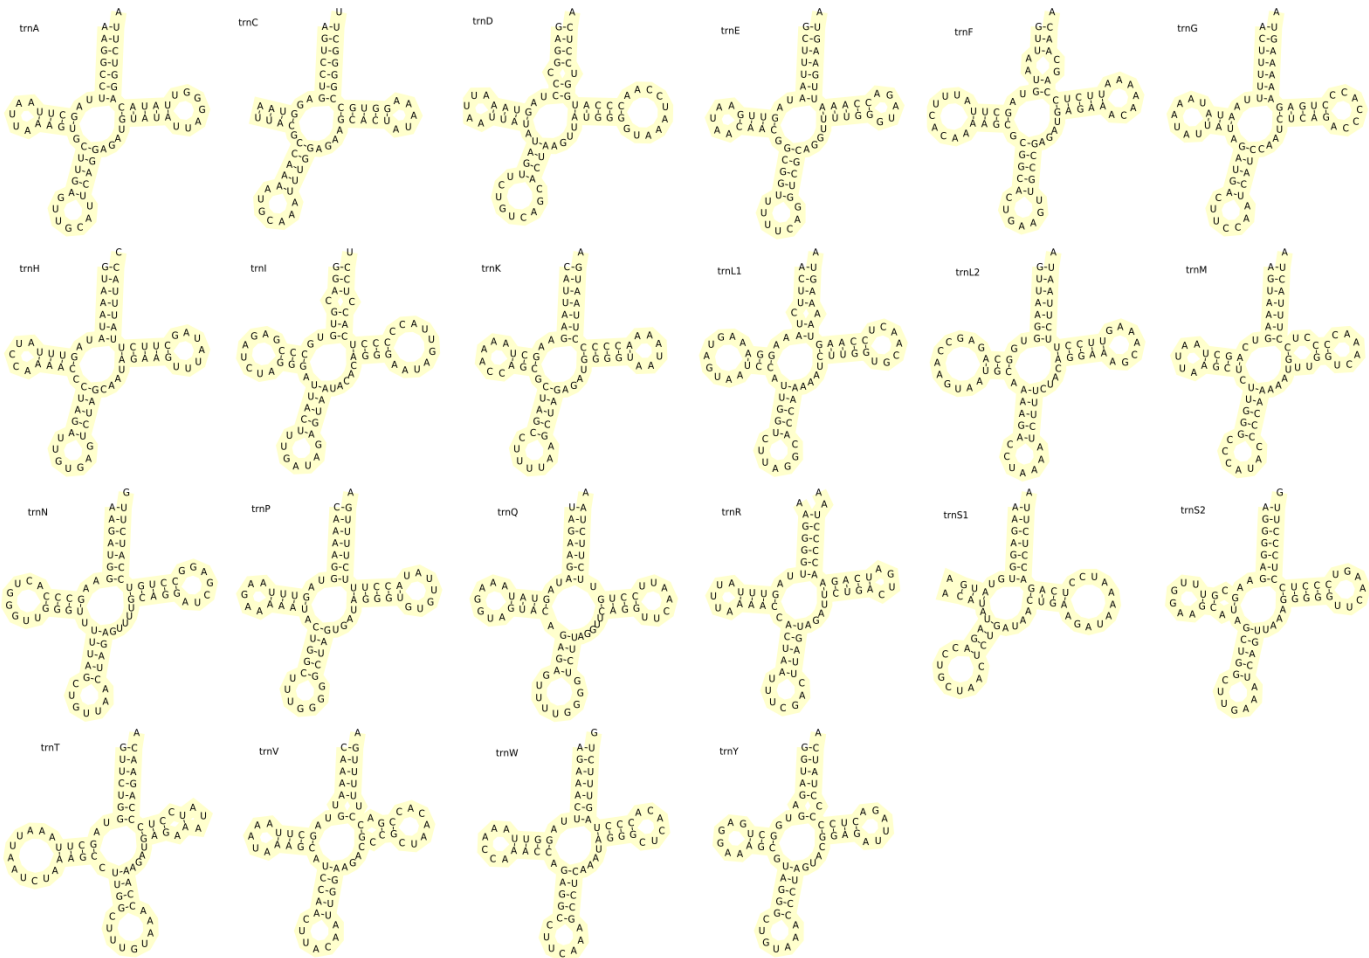

(c) *Eremias nikolskii*

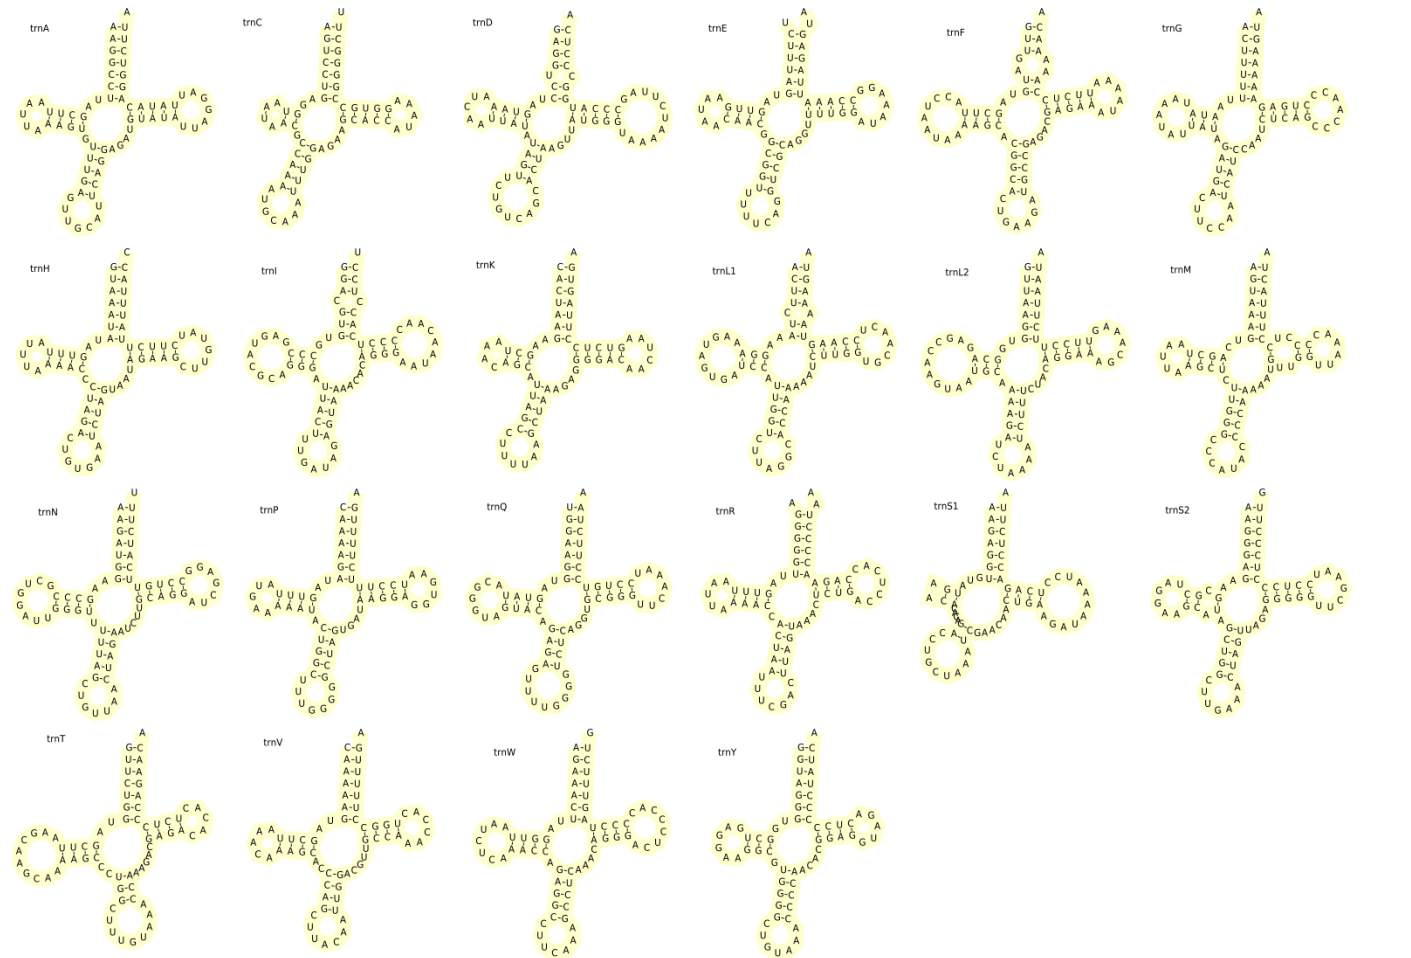

(d) *Eremias szcherbaki*

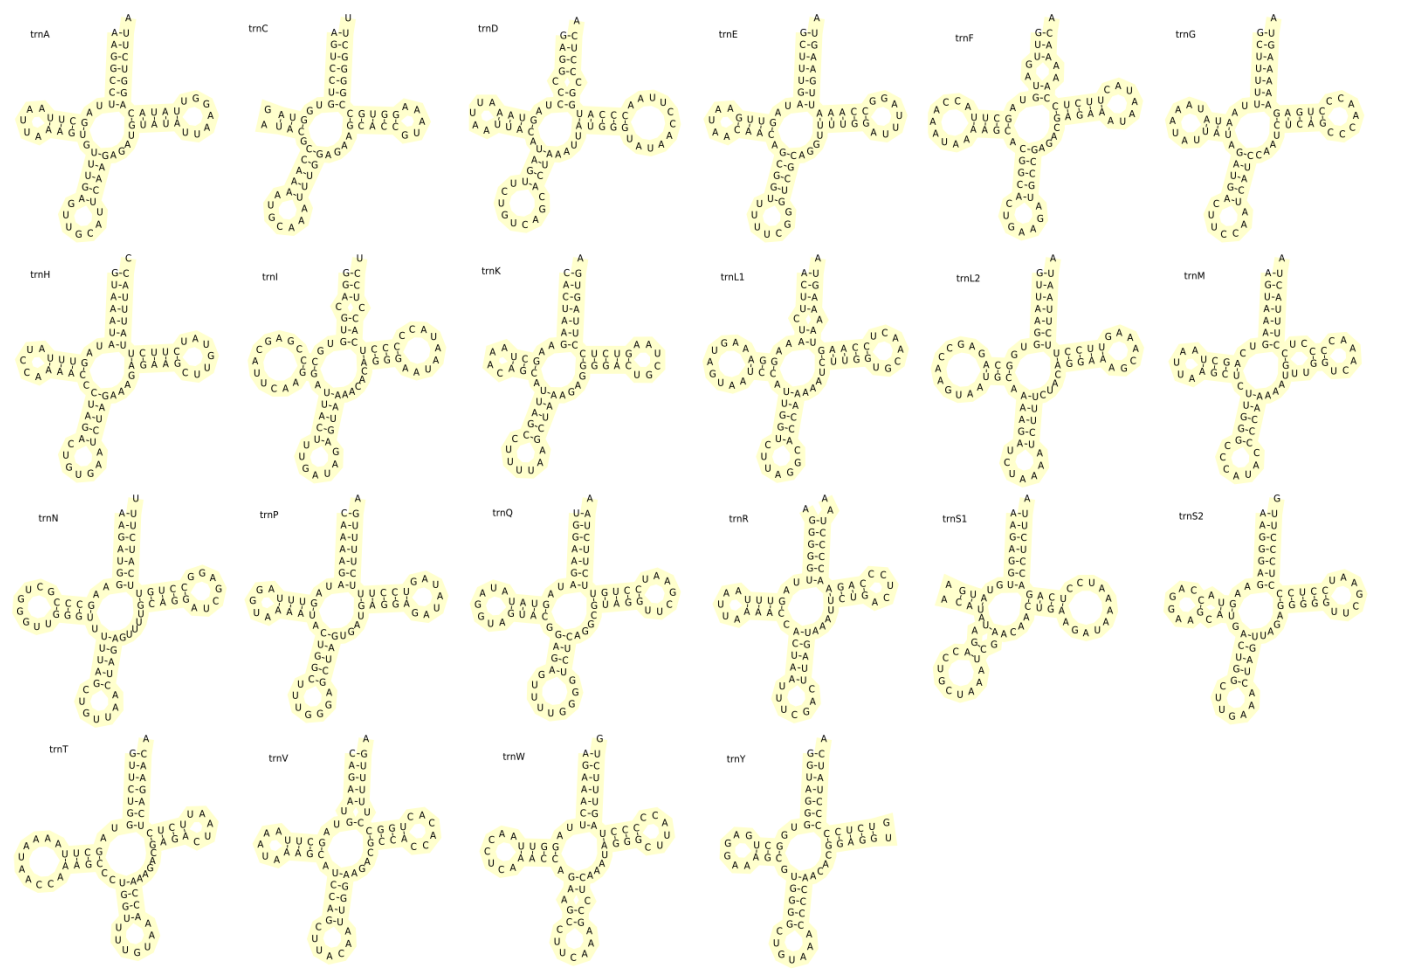

(e) *Eremias yarkandensis*

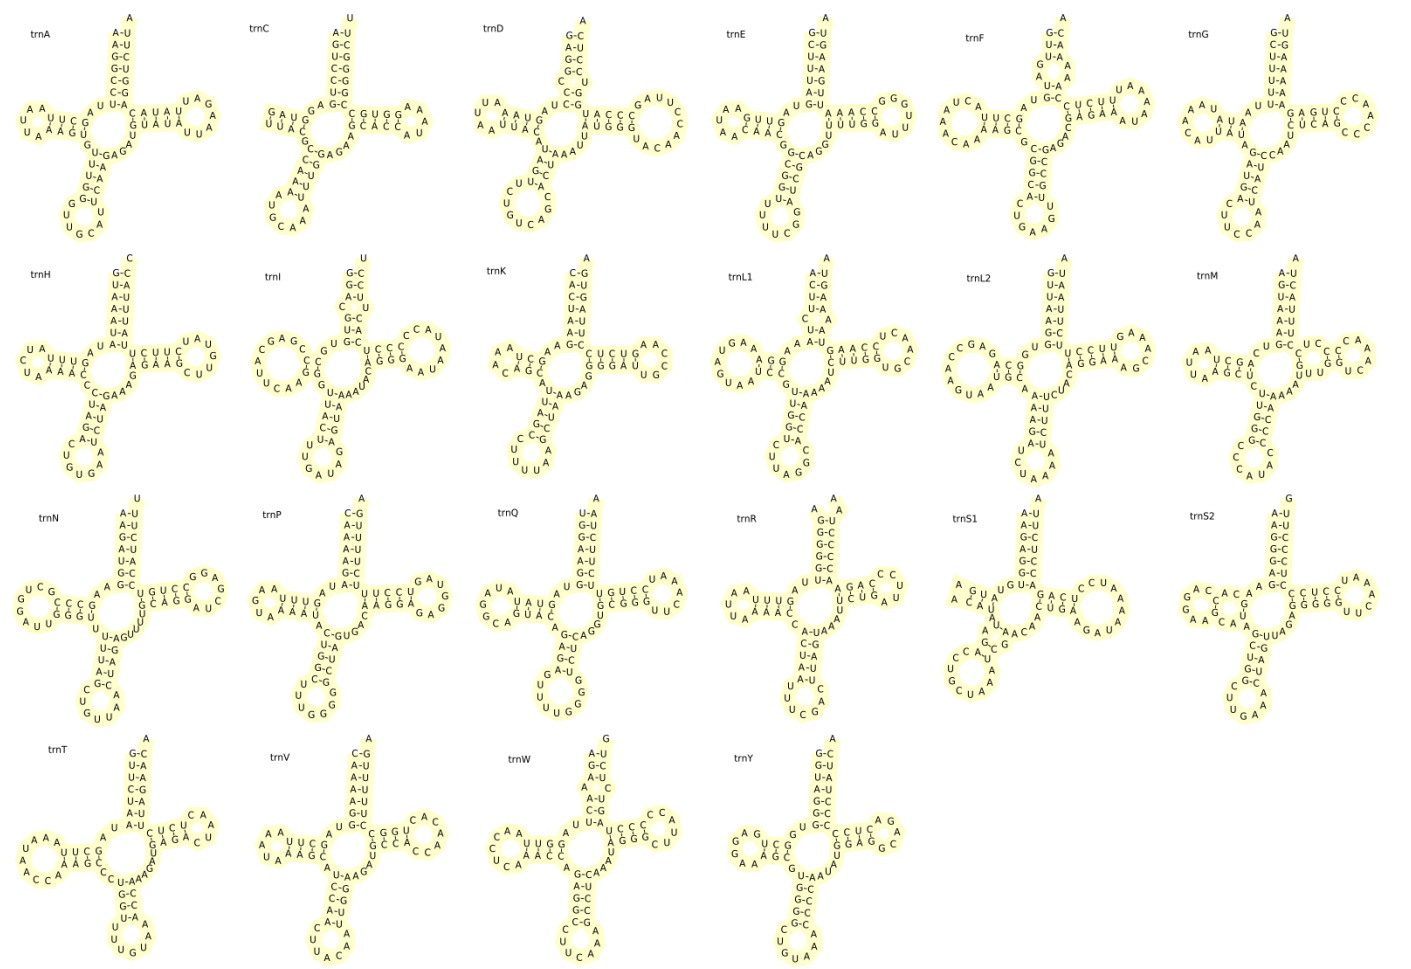

Supplement: s1 [file s1]
