# Supplementary material for: Complete Mitochondrial Genomes of Five Racerunners (Lacertidae: Eremias) and Comparison with Other Lacertids: Insights into the Structure and Evolution of the Control Region
Source: MDPI journal article supplement (doi:10.3390/genes13050726), 2022-04-21
Supplement: s1 [file s1]

**Table S7.** Uncorrected genetic distances (p-distances) within and between *Pareremias* and *E. nikolskii* based on 13 concatenated PCGs.

|                                           | 1     | 2     | 3 | 4 | 5 | 6     | 7     | 8     | 9     | 10    | 11 |
|-------------------------------------------|-------|-------|---|---|---|-------|-------|-------|-------|-------|----|
| 1. <i>E. nikolskii</i>                    |       |       |   |   |   |       |       |       |       |       |    |
| 2. Viviparous group                       | 0.108 |       |   |   |   |       |       |       |       |       |    |
| 3. <i>E. argus</i> - <i>E. brenchleyi</i> | 0.123 | 0.123 |   |   |   |       |       |       |       |       |    |
| 4. <i>E. argus</i>                        | 0.122 | –     | – | – |   |       |       |       |       |       |    |
| 5. <i>E. brenchleyi</i>                   | 0.124 | –     | – | – |   |       |       |       |       |       |    |
| 6. <i>E. szczerbaki</i>                   | 0.107 | –     | – | – | – |       |       |       |       |       |    |
| 7. <i>E. yarkamdensis</i>                 | 0.105 | –     | – | – | – | 0.087 |       |       |       |       |    |
| 8. <i>E. dzungarica</i>                   | 0.106 | –     | – | – | – | 0.088 | 0.039 |       |       |       |    |
| 9. <i>E. przewalskii</i>                  | 0.109 | –     | – | – | – | 0.091 | 0.043 | 0.051 |       |       |    |
| 10. <i>E. stummeri</i>                    | 0.109 | –     | – | – | – | 0.067 | 0.084 | 0.087 | 0.089 |       |    |
| 11. <i>E. multiocellata</i>               | 0.109 | –     | – | – | – | 0.092 | 0.079 | 0.087 | 0.084 | 0.091 |    |
