# Supplementary material for: Complete Mitochondrial Genomes of Five Racerunners (Lacertidae: Eremias) and Comparison with Other Lacertids: Insights into the Structure and Evolution of the Control Region
Source: MDPI journal article supplement (doi:10.3390/genes13050726), 2022-04-21
Supplement: s1 [file s1]

Five subgenera in *Eremias*

- *Pareremais*
- ◆ *Eremias*
- ☆ *Scapteria*
- ★ *Rhabderemias*
- *Ommateremias*

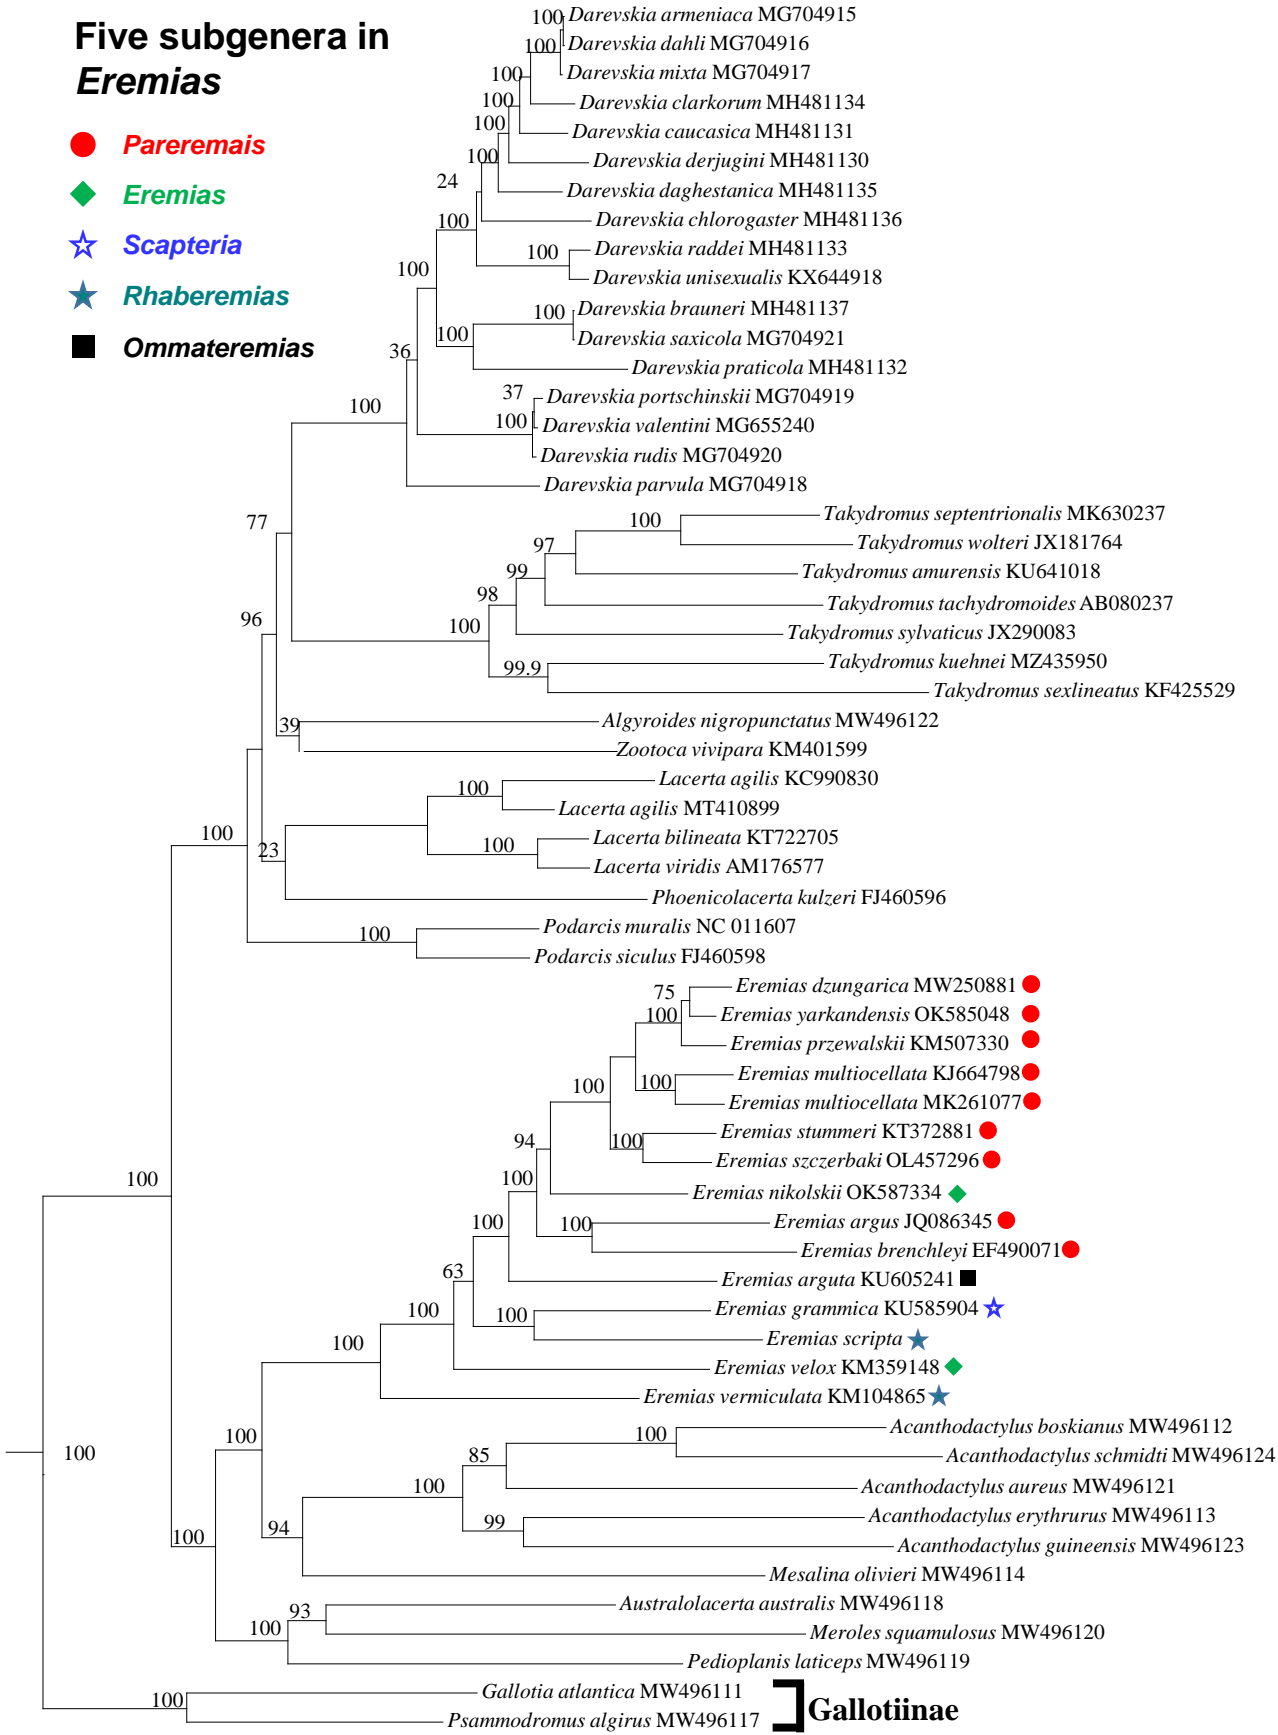

Lacertinae

Eremiinae

Gallotiinae

0.1 substitutions/site
