# Supplementary material for: Complete Mitochondrial Genomes of Five Racerunners (Lacertidae: Eremias) and Comparison with Other Lacertids: Insights into the Structure and Evolution of the Control Region
Source: MDPI journal article supplement (doi:10.3390/genes13050726), 2022-04-21
Supplement: s1 [file s1]

**Table S3.** The A+T composition of the complete mitogenomes, PCGs, rRNAs, tRNAs and CR, and composition skew values in Lacertidae.

| Species                          | Total      |             | PCGs        |                         | rRNAs      |            | tRNAs      |            | CR         |
|----------------------------------|------------|-------------|-------------|-------------------------|------------|------------|------------|------------|------------|
|                                  | A+T<br>(%) | AT-<br>skew | GC-<br>skew | Number of amino<br>acid | A+T<br>(%) | A+T<br>(%) | A+T<br>(%) | A+T<br>(%) | A+T<br>(%) |
| <i>Acanthodactylus aureus</i>    | 59.65      | 0.010       | -0.319      | 11371                   | 59.15      | 57.79      | 60.05      | 68.2       |            |
| <i>Ac. boskianus</i>             | 57.95      | 0.041       | -0.352      | 11369                   | 57.32      | 55.69      | 58.99      | 68.3       |            |
| <i>Ac. erythrurus</i>            | 60.90      | 0.007       | -0.313      | 11373                   | 61.04      | 58.34      | 60.21      | 66.6       |            |
| <i>Ac. guineensis</i>            | 60.81      | 0.025       | -0.319      | 11323                   | 60.79      | 60.24      | 60.84      | 65.9       |            |
| <i>Ac. schmidtii</i>             | 56.88      | 0.056       | -0.343      | 11340                   | 55.79      | 55.87      | 59.18      | 66.5       |            |
| <i>Australolacerta australis</i> | 67.85      | 0.024       | -0.335      | 11367                   | 62.37      | 59.44      | 61.76      | 67.8       |            |
| <i>Algyroides nigropunctatus</i> | 59.78      | 0.048       | -0.341      | 11355                   | 59.50      | 58.57      | 60.18      | 76.7       |            |
| <i>Darevskia armeniaca</i>       | 60.40      | 0.056       | -0.359      | 11352                   | 60.30      | 58.64      | 59.64      | 66.6       |            |
| <i>D. braueri</i>                | 60.14      | 0.058       | -0.344      | 11371                   | 59.80      | 58.46      | 58.45      | 67.4       |            |
| <i>D. caucasica</i>              | 59.53      | 0.057       | -0.348      | 11370                   | 60.05      | 58.55      | 58.50      | 57.6       |            |
| <i>D. chlorogaster</i>           | 59.14      | 0.058       | -0.338      | 11370                   | 58.87      | 58.06      | 57.47      | 63.6       |            |
| <i>D. clarkorum</i>              | 60.24      | 0.066       | -0.352      | 11370                   | 60.49      | 58.70      | 58.60      | 64.7       |            |
| <i>D. daghestanica</i>           | 60.14      | 0.063       | -0.356      | 11370                   | 59.97      | 58.12      | 58.80      | 66.5       |            |
| <i>D. dahli</i>                  | 60.46      | 0.058       | -0.359      | 11352                   | 60.30      | 58.68      | 59.61      | 65.6       |            |
| <i>D. derjugini</i>              | 60.17      | 0.053       | -0.339      | 11370                   | 59.93      | 58.54      | 58.57      | 66.4       |            |
| <i>D. mixta</i>                  | 60.43      | 0.058       | -0.359      | 11352                   | 60.26      | 58.60      | 59.55      | 66.5       |            |
| <i>D. parvula</i>                | 59.41      | 0.077       | -0.368      | 11355                   | 59.21      | 57.75      | 58.72      | 67.1       |            |
| <i>D. portschinskii</i>          | 59.58      | 0.075       | -0.373      | 11367                   | 59.33      | 58.28      | 59.57      | 65.7       |            |
| <i>D. praticola</i>              | 58.29      | 0.067       | -0.334      | 11376                   | 57.87      | 57.60      | 57.90      | 66.1       |            |
| <i>D. raddei</i>                 | 60.46      | 0.087       | -0.419      | 11370                   | 59.54      | 58.52      | 58.77      | 64.4       |            |
| <i>D. rudis</i>                  | 59.83      | 0.077       | -0.372      | 11370                   | 59.45      | 57.77      | 59.48      | 67.2       |            |
| <i>D. saxicola</i>               | 60.19      | 0.066       | -0.352      | 11355                   | 59.83      | 58.51      | 59.01      | 67.5       |            |
| <i>D. unisexualis</i>            | 60.24      | 0.094       | -0.435      | 11357                   | 59.44      | 58.25      | 59.91      | 66.1       |            |
| <i>D. valentini</i>              | 59.82      | 0.072       | -0.367      | 11370                   | 59.45      | 58.12      | 59.33      | 67.4       |            |
| <i>Eremias argus</i>             | 58.38      | 0.025       | -0.328      | 11387                   | 57.35      | 55.84      | 58.23      | 64.4       |            |
| <i>E. brenchleyi</i>             | 58.43      | 0.031       | -0.326      | 11369                   | 56.84      | 55.90      | 59.46      | 64.3       |            |
| <i>E. dzungarica</i>             | 60.04      | 0.054       | -0.341      | 11375                   | 57.35      | 56.60      | 59.05      | 69.3       |            |
| <i>E. multiocellata</i>          | 59.46      | 0.048       | -0.339      | 11375                   | 57.45      | 56.94      | 59.34      | 66.6       |            |
| <i>E. nikolskii</i>              | 58.54      | 0.043       | -0.351      | 11374                   | 56.08      | 55.45      | 58.27      | 65.3       |            |
| <i>E. przewalskii</i>            | 58.19      | 0.042       | -0.334      | 11375                   | 57.27      | 56.58      | 60.16      | 62.9       |            |
| <i>E. scripta</i> KZL15          | 61.33      | 0.046       | -0.324      | 11375                   | 58.65      | 55.76      | 59.71      | 71.5       |            |
| <i>E. scripta</i> KZL44          | 61.16      | 0.046       | -0.325      | 11374                   | 58.71      | 56.76      | 59.74      | 71.5       |            |
| <i>E. stummeri</i>               | 59.62      | 0.049       | -0.347      | 11374                   | 57.55      | 56.15      | 59.27      | 67.7       |            |
| <i>E. szczyrbaki</i>             | 59.47      | 0.053       | -0.347      | 11375                   | 57.00      | 57.07      | 58.86      | 67.8       |            |
| <i>E. vermiculata</i>            | 59.82      | 0.034       | -0.355      | 11375                   | 58.29      | 56.50      | 58.52      | 66.0       |            |
| <i>E. yarkandensis</i>           | 59.46      | 0.046       | -0.343      | 11375                   | 57.55      | 57.26      | 58.96      | 68.0       |            |
| <i>Gallotia atlantica</i>        | 57.61      | 0.135       | -0.356      | 11379                   | 57.89      | 57.31      | 56.69      |            |            |
| <i>Lacerta agilis</i>            | 60.31      | 0.038       | -0.330      | 11368                   | 59.98      | 58.70      | 59.38      | 65.9       |            |
| <i>L. bilineata</i>              | 59.54      | 0.050       | -0.349      | 11369                   | 59.06      | 58.46      | 58.42      | 70.2       |            |
| <i>L. viridis viridis</i>        | 59.95      | 0.048       | -0.341      | 11355                   | 59.44      | 57.82      | 58.82      | 66.1       |            |
| <i>Meroles squamulosus</i>       | 59.35      | 0.047       | -0.356      | 11366                   | 59.23      | 57.54      | 60.40      | 64.6       |            |
| <i>Mesalina olivieri</i>         | 60.04      | 0.040       | -0.336      | 11376                   | 59.92      | 58.06      | 60.04      | 66.0       |            |
| <i>Pedioplanis laticeps</i>      | 59.78      | 0.052       | -0.344      | 11369                   | 59.75      | 57.73      | 60.11      | 64.3       |            |
| <i>Phoenicolacerta kulzeri</i>   | 60.47      | 0.035       | -0.325      | 11366                   | 60.36      | 59.09      | 60.44      | 63.5       |            |
| <i>Podarcis muralis</i>          | 61.45      | 0.033       | -0.333      | 11367                   | 62.18      | 59.17      | 59.23      | 61.6       |            |
| <i>Po. siculus</i>               | 60.80      | 0.040       | -0.348      | 11370                   | 60.94      | 59.59      | 59.79      | 62.7       |            |
| <i>Psammmodromus algirus</i>     | 60.70      | 0.118       | -0.345      | 11375                   | 60.71      | 59.31      | 59.79      | 68.3       |            |
| <i>Takydromus amurensis</i>      | 60.03      | 0.040       | -0.304      | 11375                   | 59.62      | 58.24      | 59.87      | 65.5       |            |
| <i>T. kuehnei</i>                | 61.34      | 0.005       | -0.284      | 11369                   | 61.18      | 59.06      | 61.24      | 66.0       |            |
| <i>T. septentrionalis</i>        | 61.87      | 0.021       | -0.307      | 11372                   | 61.69      | 60.11      | 60.95      | 65.0       |            |
| <i>T. sexlineatus</i>            | 62.28      | 0.011       | -0.308      | 11365                   | 62.85      | 60.43      | 62.07      | 57.9       |            |
| <i>T. sylvaticus</i>             | 60.26      | 0.032       | -0.310      | 11370                   | 60.17      | 58.94      | 59.81      | 62.5       |            |
| <i>T. tachydromoides</i>         | 60.34      | 0.023       | -0.296      | 11374                   | 59.29      | 59.47      | 59.75      | 66.5       |            |
| <i>T. wolteri</i>                | 61.99      | 0.010       | -0.290      | 11372                   | 62.22      | 59.70      | 61.10      | 64.0       |            |
| <i>Zootoca vivipara</i>          | 63.24      | 0.040       | -0.320      | 11375                   | 63.62      | 60.50      | 60.66      | 68.1       |            |
