# Supplementary material for: Complete Mitochondrial Genomes of Five Racerunners (Lacertidae: Eremias) and Comparison with Other Lacertids: Insights into the Structure and Evolution of the Control Region
Source: MDPI journal article supplement (doi:10.3390/genes13050726), 2022-04-21
Supplement: s1 [file s1]

**Table S4.** Position of conserved structural elements of the CR in Lacertidae.

| Species                          | TAS 1 |      | TAS 2 |      | CSB 1 |      | CSB 2 |      | CSB 3 |      |
|----------------------------------|-------|------|-------|------|-------|------|-------|------|-------|------|
|                                  | From  | To   |
| <i>Acanthodactylus aureus</i>    | 15    | 38   | 83    | 92   | 726   | 763  | 1012  | 1029 | 1065  | 1084 |
| <i>Ac. boskianus</i>             | 15    | 38   | 83    | 92   | 725   | 762  | 1013  | 1030 | 1066  | 1085 |
| <i>Ac. erythrurus</i>            | 15    | 38   | 83    | 92   |       |      | 252   | 269  |       |      |
| <i>Ac. guineensis</i>            | 15    | 38   | 64    | 73   | 725   | 763  |       |      |       |      |
| <i>Ac. schmidtii</i>             | 15    | 38   | 83    | 92   | 724   | 761  | 1010  | 1027 | 1063  | 1082 |
| <i>Australolacerta australis</i> | 15    | 38   | 108   | 117  |       |      | 1011  | 1028 | 1065  | 1084 |
| <i>Algyroides nigropunctatus</i> | 15    | 38   | 116   | 125  |       |      |       |      |       |      |
| <i>Darevskia armeniaca</i>       | 264   | 287  | 357   | 366  | 979   | 1016 | 1266  | 1283 | 1320  | 1339 |
| <i>D. brauneri</i>               | 119   | 142  | 212   | 221  | 834   | 871  | 1121  | 1138 | 1175  | 1194 |
| <i>D. caucasica</i>              |       |      | 257   | 266  | 691   | 728  |       |      |       |      |
| <i>D. chlorogaster</i>           | 629   | 652  | 1585  | 1594 | 1342  | 1379 | 1629  | 1646 | 1683  | 1702 |
| <i>D. clarkorum</i>              |       |      | 521   | 530  |       |      |       |      | 560   | 579  |
| <i>D. daghestanica</i>           | 325   | 348  | 419   | 428  | 1039  | 1076 | 1326  | 1343 | 1380  | 1399 |
| <i>D. dahli</i>                  | 262   | 285  | 355   | 364  | 977   | 1014 | 1264  | 1281 | 1318  | 1337 |
| <i>D. derjugini</i>              | 175   | 198  | 1447  | 1456 | 812   | 849  | 1099  | 1116 | 1153  | 1172 |
| <i>D. mixta</i>                  | 266   | 289  | 359   | 368  | 981   | 1018 | 1268  | 1285 | 1322  | 1341 |
| <i>D. parvula</i>                | 258   | 281  | 351   | 360  | 973   | 1010 | 1260  | 1277 | 1314  | 1333 |
| <i>D. portschinskii</i>          | 278   | 301  | 371   | 380  | 993   | 1030 | 1280  | 1297 | 1334  | 1353 |
| <i>D. praticola</i>              |       |      | 109   | 118  | 379   | 416  | 665   | 682  | 719   | 738  |
| <i>D. raddei</i>                 | 2935  | 2958 | 4285  | 4294 | 3649  | 3686 | 3936  | 3953 | 3990  | 4009 |
| <i>D. rudis</i>                  | 260   | 283  | 353   | 362  | 974   | 1011 | 1261  | 1278 | 1315  | 1334 |
| <i>D. saxicola</i>               | 270   | 293  | 363   | 372  | 985   | 1022 | 1272  | 1289 | 1326  | 1345 |
| <i>D. unisexualis</i>            | 270   | 293  | 414   | 423  | 984   | 1021 | 1271  | 1288 | 1325  | 1344 |
| <i>D. valentini</i>              | 235   | 258  | 328   | 337  | 950   | 987  | 1236  | 1253 | 1290  | 1309 |
| <i>Eremias argus</i>             | 695   | 718  | 728   | 737  | 1404  | 1441 | 1690  | 1707 | 1744  | 1763 |
| <i>E. brenchleyi</i>             | 1029  | 1049 | 1822  | 1831 | 1736  | 1773 | 2043  | 2060 | 2097  | 2116 |
| <i>E. dzungarica</i>             | 484   | 507  | 577   | 586  | 1196  | 1233 | 1502  | 1519 | 1556  | 1575 |
| <i>E. multiocellata</i>          | 531   | 555  | 581   | 590  | 1064  | 1101 | 1370  | 1387 | 1424  | 1443 |
| <i>E. nikolskii</i>              | 1023  | 1046 | 1116  | 1125 | 1734  | 1771 | 2039  | 2057 | 2094  | 2113 |
| <i>E. przewalskii</i>            | 618   | 641  | 711   | 720  | 1329  | 1366 | 1635  | 1652 | 1689  | 1708 |
| <i>E. scripta</i> KZL15          | 809   | 832  | 877   | 886  | 1520  | 1557 | 1826  | 1843 | 1880  | 1899 |
| <i>E. scripta</i> KZL44          | 676   | 699  | 744   | 753  | 1387  | 1424 | 1693  | 1710 | 1747  | 1766 |
| <i>E. stummeri</i>               | 704   | 727  | 753   | 762  | 1415  | 1452 | 1720  | 1737 | 1774  | 1793 |
| <i>E. szczyrbaki</i>             | 472   | 495  | 565   | 574  | 1183  | 1220 | 1489  | 1506 | 1543  | 1562 |
| <i>E. vermiculata</i>            | 1104  | 1127 | 1197  | 1206 | 1816  | 1853 |       |      | 2167  | 2186 |
| <i>E. yarkandensis</i>           | 469   | 492  | 562   | 571  | 1181  | 1218 | 1487  | 1504 | 1541  | 1560 |
| <i>Lacerta agilis</i>            | 267   | 290  | 360   | 369  | 980   | 1017 | 1178  | 1295 | 1333  | 1352 |
| <i>L. bilineata</i>              | 4     | 27   | 97    | 106  | 715   | 752  | 1012  | 1029 | 1066  | 1085 |
| <i>L. viridis viridis</i>        | 321   | 344  | 414   | 423  | 1034  | 1071 | 1342  | 1359 | 1397  | 1416 |
| <i>Meroles squamulosus</i>       |       |      |       |      | 713   | 750  | 999   | 1016 | 1051  | 1070 |
| <i>Mesalina olivieri</i>         | 15    | 38   | 142   | 151  | 725   | 762  | 1034  | 1051 | 1089  | 1108 |

|                                |      |      |      |      |      |      |      |      |      |      |
|--------------------------------|------|------|------|------|------|------|------|------|------|------|
| <i>Pedioplanis laticeps</i>    | 15   | 38   | 108  | 117  | 725  | 762  | 973  | 990  | 1065 | 1084 |
| <i>Phoenicolacerta kulzeri</i> | 400  | 423  | 494  | 503  | 1114 | 1151 | 1401 | 1418 | 1455 | 1474 |
| <i>Podarcis muralis</i>        | 462  | 485  | 511  | 520  | 1172 | 1209 | 1458 | 1475 | 1512 | 1531 |
| <i>Podarcis siculus</i>        | 432  | 455  | 526  | 535  | 1144 | 1181 | 1430 | 1447 | 1484 | 1503 |
| <i>Psammodromus algirus</i>    | 15   | 38   | 190  | 199  | 727  | 764  | 1016 | 1033 | 1070 | 1089 |
| <i>Takydromus amurensis</i>    |      |      | 1486 | 1495 | 1243 | 1280 | 1531 | 1548 | 1586 | 1605 |
| <i>T. kuehnei</i>              | 400  | 423  | 1775 | 1784 | 1113 | 1150 | 1400 | 1417 | 1805 | 1824 |
| <i>T. septentrionalis</i>      | 1502 | 1525 | 2876 | 2885 | 2218 | 2255 | 2505 | 2522 | 2559 | 2578 |
| <i>T. sexlineatus</i>          |      |      | 2031 | 2040 |      |      |      |      |      |      |
| <i>T. sylvaticus</i>           | 1040 | 1063 | 2414 | 2423 | 1756 | 1793 | 2043 | 2060 | 2097 | 2116 |
| <i>T. wolteri</i>              | 1440 | 1463 | 2818 | 2827 | 2157 | 2194 | 2445 | 2462 | 2500 | 2519 |
| <i>Zootoca vivipara</i>        | 258  | 281  | 351  | 360  | 971  | 1008 | 1258 | 1275 | 1313 | 1332 |
