# Supplementary material for: Complete Mitochondrial Genomes of Five Racerunners (Lacertidae: Eremias) and Comparison with Other Lacertids: Insights into the Structure and Evolution of the Control Region
Source: MDPI journal article supplement (doi:10.3390/genes13050726), 2022-04-21
Supplement: s1 [file s1]

**Table S1.** Best-fit models and partitioning schemes selected by PartitionFinder 2.

(a) for BI

| Partition No. | Partition identity         | Subset                                      | Length (bp) | Best Model |
|---------------|----------------------------|---------------------------------------------|-------------|------------|
| P1            | <i>ATP6</i>                | 1-681                                       | 681         | GTR+I+G    |
| P2            | <i>ATP8</i>                | 682-846                                     | 165         | GTR+I+G    |
| P3            | <i>COI</i>                 | 847-2403                                    | 1557        | GTR+I+G    |
| P4            | <i>COII</i>                | 2404-3090                                   | 687         | GTR+I+G    |
| P5            | <i>COIII</i>               | 3091-3882                                   | 792         | GTR+I+G    |
| P6            | <i>CYTB</i>                | 3883-5022                                   | 1140        | GTR+I+G    |
| P7            | <i>ND1, ND4L, ND3, ND5</i> | 5023-5991,7375-7668<br>7030-7374,9055-10881 | 3435        | GTR+I+G    |
| P8            | <i>ND2</i>                 | 5992-7029                                   | 1038        | GTR+I+G    |
| P9            | <i>ND4</i>                 | 7669-9054                                   | 1386        | GTR+I+G    |
| P10           | <i>ND6</i>                 | 10882-11409                                 | 528         | GTR+I+G    |

(b) for ML

| Partition No. | Partition identity         | Subset                                      | Length (bp) | Best Model |
|---------------|----------------------------|---------------------------------------------|-------------|------------|
| P1            | <i>ATP6</i>                | 1-681                                       | 681         | TVM+I+G    |
| P2            | <i>ATP8</i>                | 682-846                                     | 165         | GTR+I+G    |
| P3            | <i>COI</i>                 | 847-2403                                    | 1557        | GTR+I+G    |
| P4            | <i>COII</i>                | 2404-3090                                   | 687         | GTR+I+G    |
| P5            | <i>COIII</i>               | 3091-3882                                   | 792         | GTR+I+G    |
| P6            | <i>CYTB</i>                | 3883-5022                                   | 1140        | GTR+I+G    |
| P7            | <i>ND1, ND4L, ND3, ND5</i> | 5023-5991,7375-7668<br>7030-7374,9055-10881 | 3435        | GTR+I+G    |
| P8            | <i>ND2</i>                 | 5992-7029                                   | 1038        | GTR+I+G    |
| P9            | <i>ND4</i>                 | 7669-9054                                   | 1386        | GTR+I+G    |
| P10           | <i>ND6</i>                 | 10882-11409                                 | 528         | GTR+I+G    |
