# Supplementary material for: Complete Mitochondrial Genomes of Five Racerunners (Lacertidae: Eremias) and Comparison with Other Lacertids: Insights into the Structure and Evolution of the Control Region
Source: MDPI journal article supplement (doi:10.3390/genes13050726), 2022-04-21
Supplement: s1 [file s1]

**Table S5.** Compositions of conserved structures of the CR in Lacertidae.

| Species                          | TAS1                          | TAS2          | CSB1                                   | CSB2                    | CSB3                        |
|----------------------------------|-------------------------------|---------------|----------------------------------------|-------------------------|-----------------------------|
| <i>Lacerta dugesii</i>           | ACTATTATGTATATAGTGCATTAA      | CATACATTAA    | CTATATGGTATTATTGTCTTAATGCTTGGTAGACATAT | CAAACCCCCCTACCCCC       | TCGCCAAACCCCTAAAACGA        |
| <i>Acanthodactylus aureus</i>    | ..... A .....                 | ..... T       | ..... G A .....                        | .....                   | ..... A .....               |
| <i>Ac. boskianus</i>             | ..... A .....                 | A ..... T     | ..... G A .....                        | .....                   | ..... A .....               |
| <i>Ac. erythrurus</i>            | ..... A .....                 | T ..... A · T |                                        | T ..... T · T ..... T   |                             |
| <i>Ac. guineensis</i>            | ..... A .....                 | A G .....     | ..... A .....                          | A                       |                             |
| <i>Ac. schmidtii</i>             | ..... A .....                 | T ..... T     | ..... A ..... A .....                  |                         | ..... A .....               |
| <i>Australolacerta australis</i> | ..... A .....                 | ... G .....   |                                        | .....                   | .....                       |
| <i>Algyroides nigropunctatus</i> | .....                         | ... T ... T · |                                        |                         |                             |
| <i>Darevskia armeniaca</i>       | .....                         | T · G .....   | ..... C · T .....                      | .....                   | ... T ..... A .....         |
| <i>D. brauneri</i>               | .....                         | T · G .....   | ..... G .....                          | .....                   | .....                       |
| <i>D. caucasica</i>              | .....                         | T · C .....   | ..... C · T .....                      | .....                   | .....                       |
| <i>D. chlorogaster</i>           | .....                         | T · T .....   | ..... C · T .....                      | .....                   | .....                       |
| <i>D. clarkorum</i>              | .....                         | T · T .....   |                                        |                         | .....                       |
| <i>D. daghestanica</i>           | .....                         | T · G .....   | ..... C · T .....                      | .....                   | .....                       |
| <i>D. dahli</i>                  | .....                         | T · G .....   | ..... C · T .....                      | .....                   | .....                       |
| <i>D. derjugini</i>              | .....                         | T .....       | ..... C · T .....                      | .....                   | .....                       |
| <i>D. mixta</i>                  | .....                         | T · G .....   | ..... C · T .....                      | .....                   | .....                       |
| <i>D. parvula</i>                | .....                         | T · G .....   | ..... C · T .....                      | .....                   | .....                       |
| <i>D. portschinskii</i>          | .....                         | T · G .....   | ..... C · T .....                      | .....                   | .....                       |
| <i>D. praticola</i>              | .....                         | ... A C · G · | ..... G · C · T .....                  | .....                   | .....                       |
| <i>D. raddei</i>                 | .....                         | T .....       | ..... C · T .....                      | .....                   | .....                       |
| <i>D. rudis</i>                  | .....                         | T · G .....   | ..... C · T .....                      | ..... T ·               | .....                       |
| <i>D. saxicola</i>               | .....                         | T · G .....   | ..... G .....                          | .....                   | .....                       |
| <i>D. unisexualis</i>            | .....                         | T ..... C     | ..... C · T .....                      | .....                   | .....                       |
| <i>D. valentini</i>              | .....                         | T · G .....   | ..... C · T .....                      | .....                   | .....                       |
| <i>Eremias argus</i>             | ..... C · G · ..... C ..... C | · C · G A ·   | ..... G ..... A · G .....              | ... T · T · T ..... T · | C ..... T T · C G ..... C · |

|                                |                       |             |                          |                    |                    |
|--------------------------------|-----------------------|-------------|--------------------------|--------------------|--------------------|
| <i>E. brechleyi</i>            | .....T..A.....        | ..A..T....  | .....G G C.....G.....    | .....T.....G.....T | .....T..G.....A..  |
| <i>E. dzungarica</i>           | .....                 | T.....T     | ...T.....G.....          | .....              | .....              |
| <i>E. multiocellata</i>        | .....A.....           | A.....T     | ...T...G.....G.....      | .....              | .....              |
| <i>E. nikolskii</i>            | .....                 | T.....T     | .....G.....              | ...T.....          | .....T.....        |
| <i>E. przewalskii</i>          | .....                 | T..G.....   | ...T.....G.....          | .....              | .....              |
| <i>E. scripta</i> KZL15        | .....A.....           | .....A.T    | .....G.....              | .....              | .....              |
| <i>E. scripta</i> KZL44        | .....A.....           | .....A.T    | .....G.....              | .....              | .....              |
| <i>E. stummeri</i>             | .....A.....           | A.....T     | ...T.....C.T C A.....    | .....              | .....              |
| <i>E. szczyrbaki</i>           | .....C..A.....        | T.....T     | ...T.....T A..G.....     | .....              | .....              |
| <i>E. vermiculata</i>          | .....A.....           | A.....      | .....G.....C..G.....     | .....              | .....T.....G...A G |
| <i>E. yarkandensis</i>         | .....A.....           | T.....      | ...T.....G.....          | .....              | .....              |
| <i>Lacerta agilis</i>          | .....                 | T..G.....   | .....                    | .....              | .....              |
| <i>L. bilineata</i>            | .....T..A.....        | T.....      | .....                    | .....              | .....              |
| <i>L. viridis viridis</i>      | .....                 | .....       | .....                    | .....              | .....              |
| <i>Merolles squamulosus</i>    | .....                 | .....       | .....T C..G.....         | .....              | .....A.....        |
| <i>Mesalina olivieri</i>       | ..A T.....A T..A..... | ...G T..... | .....T C T..G.....C..... | .....              | .....              |
| <i>Pedioplanis laticeps</i>    | ..A.....T.....C A     | ...G.....   | .....T C..G.....         | .....              | .....A.....        |
| <i>Phoenicolacerta kulzeri</i> | .....                 | T.....      | .....                    | .....              | .....              |
| <i>Podarcis muralis</i>        | .....                 | T.....T     | .....                    | .....              | .....              |
| <i>Podarcis siculus</i>        | .....                 | T..G.....   | .....T C.....            | .....              | .....              |
| <i>Psammodromus algirus</i>    | ..A T.....G           | .....C..    | .....                    | .....              | .....              |
| <i>Takydromus amurensis</i>    | .....                 | T...A.....  | .....                    | .....              | .....              |
| <i>T. kuehnei</i>              | .....                 | .....A..... | .....                    | .....              | .....              |
| <i>T. septentrionalis</i>      | .....                 | ...T.....   | .....                    | .....              | .....              |
| <i>T. sexlineatus</i>          | .....                 | .....T..... | .....                    | .....              | .....              |
| <i>T. sylvaticus</i>           | .....                 | ...T..T..   | .....                    | .....              | .....              |
| <i>T. wolteri</i>              | .....                 | ...T.....   | .....                    | .....              | .....              |
| <i>Zootoca vivipara</i>        | .....C.....           | ..G.....    | .....                    | .....              | .....              |
